# Supplementary material
Source: publisher figshare collection journal article supplement (https://acs.figshare.com/ndownloader/files/14072081)
Supplement: Supplementary file 1 [file 14072081]

## Supporting Information (SI)

# Ebola Viral Protein 35 N-terminus is a Parallel Tetramer

Chamnongsak Ken Chanthamontri, David Jordan, Wenjie Wang, Chao Wu, Yanchun Lin, Tom J. Brett, Michael L. Gross, and Daisy W. Leung

## Supporting Figures

### Supporting Figures

```
MARCOIL predicted region: 1
Sequence: EEVVQTLASLATVVQQQTIASESLEQRITSLNGL
Register: bcdefgabcdefgabcdefgabcdefgabcdefga
Result of prediction:
                Most probable state is TETRAMER

                ANTI PARA TRIM TETRA
Raw score is   1.04 0.85 1.03 1.18
```

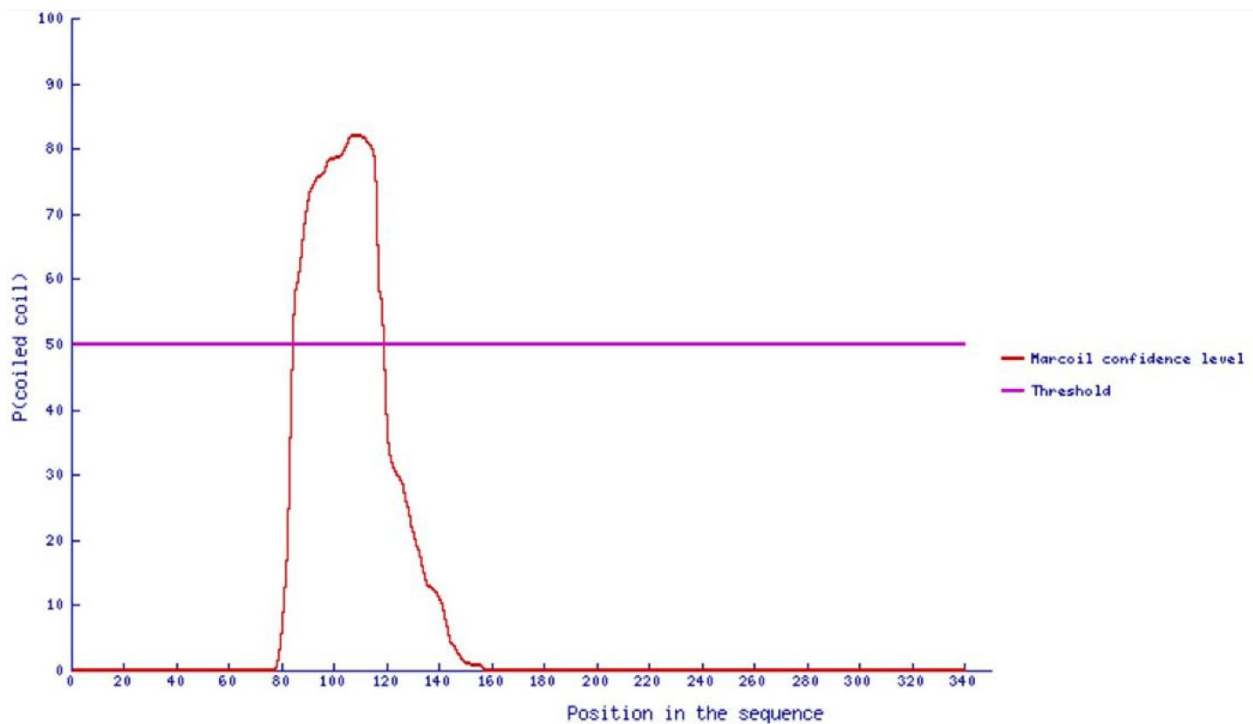

**Figure S1. LOGICOIL analysis of eVP35 constructs.** Analysis of the VP35 N-terminus sequence using the LOGICOIL algorithm indicates the residues most likely to contain a coiled-coil motif and the most probable oligomeric state as a tetramer.

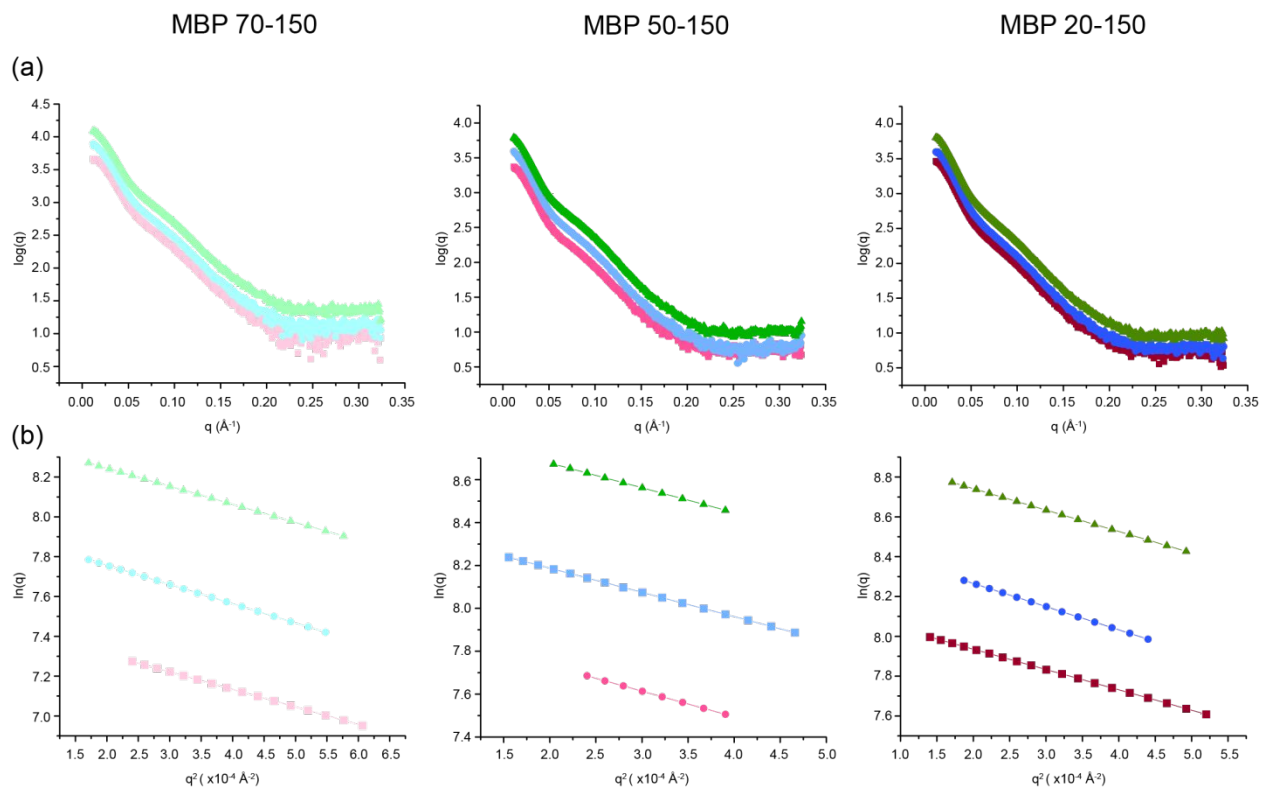

**Figure S2. SAXS analysis of eVP35 constructs.** (a) Scattering profiles and (b) Guinier plots for MBP eVP35 70-150 (left panels), MBP eVP35 50-150 (middle panels), and MBP eVP35 20-150 (right panels), respectively, at 2 (pink), 3 (blue), and 5 (green) mg/mL.

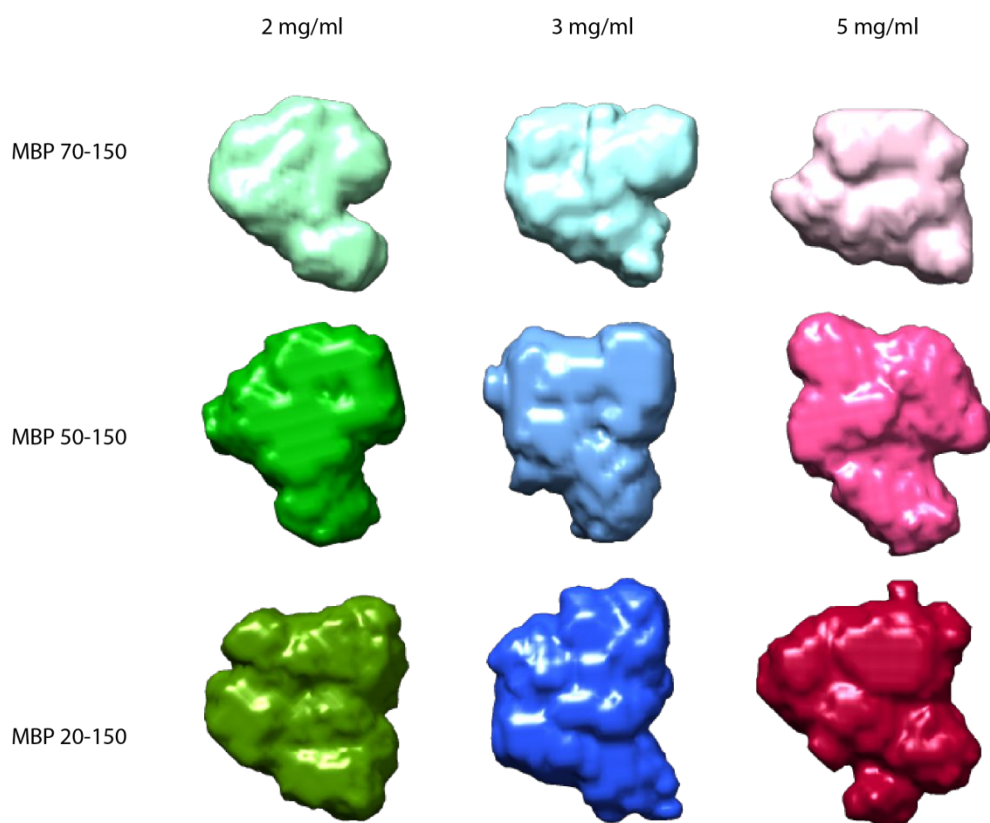

**Figure S3.** *Ab initio* models of MBP eVP35 70-150, MBP eVP35 50-150, and MBP eVP35 20-150 at the 3 protein concentrations used.
